# Supplementary material
Source: PubMed Central journal article supplement (PMC3603536)
Supplement: supp_jit034_jit034supp.pdf [file supp_jit034_jit034supp.pdf]

**Supplementary Table 1** Covariates associated with seasonal influenza A viral shedding

|               | Children<br>[n=236] |        |               | Adults<br>[n=97] |        |              |
|---------------|---------------------|--------|---------------|------------------|--------|--------------|
|               | n                   | Value* | 95% CI        | n                | Value* | 95% CI       |
| Day (per day) | -                   | 0.27   | (0.23, 0.30)  | -                | 0.11   | (0.08, 0.14) |
| Seasonal H1N1 | 158                 | 1.00   | -             | 46               | 1.00   | -            |
| Seasonal H3N2 | 78                  | 2.94   | (0.82, 10.56) | 51               | 0.84   | (0.13, 5.39) |
| Day x sH1N1   | -                   | 1.00   | -             | -                | 1.00   | -            |
| Day x sH3N2   | -                   | 0.73   | (0.58, 0.91)  | -                | 0.91   | (0.58, 1.23) |

\*The values represent the change in log<sub>10</sub> viral load associated with each covariate

**Supplementary Table 2** Estimates of the variability of  $\log_{10}$  viral shedding in cases of influenza A virus infections

|                  | Random Effect $\Psi$ (2.5 <sup>th</sup> , 97.5 <sup>th</sup> Percentiles)* |                   |
|------------------|----------------------------------------------------------------------------|-------------------|
|                  | Children only                                                              | Adult only        |
| All Seasonal A   | 1.39 (1.01, 1.78)                                                          | 0.65 (0.36, 1.12) |
| Seasonal A(H1N1) | 1.55 (1.11, 2.01)                                                          | 0.70 (0.27, 1.74) |
| Seasonal A(H3N2) | 1.09 (0.55, 1.74)                                                          | 0.61 (0.32, 1.12) |

\*The square root of the variance ( $\Psi$ ), is the standard deviation of the viral shedding intercepts

**Supplementary Table 3**

| Symptoms                | Adult  |        |        |          | Child† |        |        |         |
|-------------------------|--------|--------|--------|----------|--------|--------|--------|---------|
|                         | Low    | Mid    | High   | p-value* | Low    | Mid    | High   | p-value |
| <i>Seasonal A(H1N1)</i> | [n=15] | [n=15] | [n=16] |          | [n=52] | [n=53] | [n=53] |         |
| Self-reported fever     | 86.7%  | 100%   | 93.8%  | 0.53     | 88.4%  | 92.5%  | 98.1%  | 0.14    |
| Measured fever          | 80.0%  | 93.3%  | 87.5%  | 0.67     | 75.0%  | 81.1%  | 83.0%  | 0.57    |
| Headache                | 73.3%  | 73.3%  | 62.5%  | 0.78     | -      | -      | -      | -       |
| Sore throat             | 80.0%  | 66.7%  | 75.0%  | 0.77     | 51.9%  | 60.4%  | 60.4%  | 0.61    |
| Cough                   | 86.7%  | 80.0%  | 100%   | 0.18     | 90.4%  | 86.8%  | 88.7%  | 0.85    |
| Muscle pain             | 60.0%  | 66.6%  | 50.0%  | 0.64     | -      | -      | -      | -       |
| Runny nose              | 86.7%  | 93.3%  | 81.3%  | 0.86     | 78.8%  | 86.8%  | 92.5%  | 0.13    |
| Phlegm                  | 73.3%  | 73.3%  | 68.8%  | 1.00     | 75.0%  | 60.4%  | 66.0%  | 0.28    |
| <i>Seasonal A(H3N2)</i> | [n=17] | [n=17] | [n=17] |          | [n=26] | [n=26] | [n=26] |         |
| Self-reported fever     | 94.1%  | 100%   | 94.1%  | 1.00     | 100%   | 88.5%  | 88.5%  | 0.24    |
| Measured fever          | 70.6%  | 76.5%  | 82.4%  | 0.92     | 85.6%  | 88.5%  | 96.2%  | 0.52    |
| Headache                | 88.2%  | 58.8%  | 64.7%  | 0.14     | -      | -      | -      | -       |
| Sore throat             | 82.4%  | 82.4%  | 76.5%  | 0.90     | 65.4%  | 65.4%  | 53.8%  | 0.73    |
| Cough                   | 82.4%  | 82.4%  | 94.1%  | 0.67     | 88.5%  | 84.6%  | 84.6%  | 1.00    |
| Muscle pain             | 88.2%  | 76.5%  | 82.4%  | 0.90     | -      | -      | -      | -       |
| Runny nose              | 100%   | 76.5%  | 94.1%  | 0.11     | 96.2%  | 92.3%  | 92.3%  | 1.00    |
| Phlegm                  | 47.1%  | 52.9%  | 58.8%  | 0.79     | 53.8%  | 73.1%  | 57.7%  | 0.34    |

\*Chi-squared test or Fisher’s test when appropriate

†Headache and muscle pain in children were removed due to possible confounding since it is difficult for children to self-identify these symptoms.
